# Supplementary material
Source: PubMed Central journal article supplement (PMC3770263)
Supplement: NIHMS493591-supplement-Fig_1.pdf [file NIHMS493591-supplement-Fig_1.pdf]

**Supplementary Figure 1.** Linkage disequilibrium between pairs of *KIR* genes in the population of Curitiba. The colors indicate  $D'$  values following the color scale on the extreme right. The asterisks indicate significant  $p$  values: \*  $0.01 \leq p < 0.05$ ; \*\*  $0.001 \leq p < 0.01$  and \*\*\*  $p < 0.001$ . Strong negative LD was observed for the allelic genes *KIR2DL2/2DL3*, *KIR3DL1/3DS1* and the gene pairs *KIR2DS4/KIR2DS5*, *KIR2DS4/KIR3DS1*, *KIR2DS5/KIR3DL1* and *KIR2DP1/KIR2DL2*. Besides *KIR2DL1/KIR2DP1*, strong positive LD occurred for the pairs *KIR2DS1/KIR2DS5*, *KIR2DS5/KIR2DL5*, *KIR2DL1/KIR2DL2*, *KIR2DL5/KIR2DS1*, *KIR2DL5/KIR3DS1*, *KIR2DL3/KIR2DP1*, *KIR2DL2/KIR2DS2* and *KIR2DS1/KIR3DS1*.

|      | 2DL2 | 2DL3        | 2DL5        | 2DS1        | 2DS2        | 2DS3        | 2DS4       | 2DS5        | 3DL1        | 3DS1        | 2DP1        |      |
|------|------|-------------|-------------|-------------|-------------|-------------|------------|-------------|-------------|-------------|-------------|------|
| 2DL1 | 1.00 | 1.00<br>*** | 0.03        | 0.07        | 1.00        | 0.96        | 0.91       | 0.15        | 0.97        | 1.00        | 1.00<br>*** | -1   |
| 2DL2 |      | 0.75<br>*** | 0.47<br>*** | 0.33<br>*   | 0.88<br>*** | 0.75<br>*** | 0.21       | 0.23        | 0.16        | 0.24        | 1.00<br>*   | -0.8 |
| 2DL3 |      |             | 0.21        | 0.16        | 0.79<br>*** | 0.63<br>*** | 0.33       | 0.16        | 0.09        | 0.01        | 0.90<br>*** | -0.6 |
| 2DL5 |      |             |             | 0.91<br>*** | 0.41<br>*** | 0.78<br>*** | 0.43<br>*  | 0.98<br>*** | 0.54<br>**  | 0.91<br>*** | 0.30        | -0.4 |
| 2DS1 |      |             |             |             | 0.27<br>*** | 0.29<br>**  | 0.55<br>** | 1.00<br>*** | 0.12<br>**  | 0.88<br>*** | 0.07        | -0.2 |
| 2DS2 |      |             |             |             |             | 0.79<br>*** | 0.16       | 0.10        | 0.82        | 1.00        | 1.00<br>*   | 0    |
| 2DS3 |      |             |             |             |             |             | 0.37       | 0.01        | 0.26        | 0.25        | 0.69        | 0.2  |
| 2DS4 |      |             |             |             |             |             |            | 1.00<br>*** | 0.18<br>*** | 1.00<br>*** | 0.17        | 0.4  |
| 2DS5 |      |             |             |             |             |             |            |             | 1.00<br>*** | 0.86<br>*** | 0.07        | 0.6  |
| 3DL1 |      |             |             |             |             |             |            |             |             | 1.00<br>*** | 0.86        | 0.8  |
| 3DS1 |      |             |             |             |             |             |            |             |             |             | 0.49        | 1    |
