# Supplementary material
Source: PubMed Central journal article supplement (PMC3770263)
Supplement: NIHMS493591-supplement-Table_1.pdf [file NIHMS493591-supplement-Table_1.pdf]

**Supplementary Table 1.** Frequencies of HLA ligands for KIR3DL1/S1, KIR2DL1 and KIR2DL2/3 in the population of Curitiba.

| <b>Ligands</b>         | <b>Allele Frequencies</b> | <b>Carrier frequencies (%)</b> |
|------------------------|---------------------------|--------------------------------|
| <i>C1 (HLA-C)</i>      | 0.66                      | 83.6                           |
| <i>C2 (HLA-C)</i>      | 0.34                      | 50.9                           |
| <i>HLA-B Bw4</i>       | 0.39                      | 62.7                           |
| <i>Bw4-80I (HLA-B)</i> | 0.24                      | 45.2                           |
| <i>Bw4-80I (HLA-A)</i> | 0.20                      | 33.8                           |
